# Supplementary material for: Selective disaccharide binding by a macrotetracyclic receptor
Source: Royal Society of Chemistry journal article supplement (doi:10.1039/b618776e), 2007-01-01
Supplement: b618776e.pdf [file b618776e.pdf]

## **Selective Disaccharide Binding by a Macrotetracyclic Receptor**

Emmanuel Klein, Yann Ferrand, Elizabeth K. Auty, and Anthony P. Davis\*

*School of Chemistry, University of Bristol, Cantock's Close, Bristol, UK BS8 1TS.*

*Fax: +44 117 9298611; Tel: +44 117 9546334. E-mail: Anthony.Davis@bristol.ac.uk*

## **Supplementary Information**

### *Synthesis of Receptor 3*

**General:**  $^1\text{H}$ -NMR spectra were recorded on a JEOL/Delta GX-400 MHz, a JEOL/Eclipse-400 MHz or a Varian *INOVA* 600 MHz spectrometer.  $^{13}\text{C}$ -NMR spectra were recorded at 100 MHz on the first two instruments. Chemical shifts ( $\delta$ ) are quoted in parts per million and are calibrated relative to solvent residual peaks. Low resolution mass spectra were recorded on an Applied Biosystems Mariner API-TOF spectrometer or an Applied Biosystems Voyager MALDI-TOF spectrometer. Reactions were monitored by thin layer chromatography (TLC) on Merck silica gel 60-F<sub>254</sub> plates. Flash column chromatography was carried out on Fisher Scientific silica gel 60 (particle size 35-70  $\mu\text{m}$ ). Commercial reagents were purchased from Aldrich, Lancaster, Sigma, Strem or Fluka and were used without further purification unless otherwise specified.

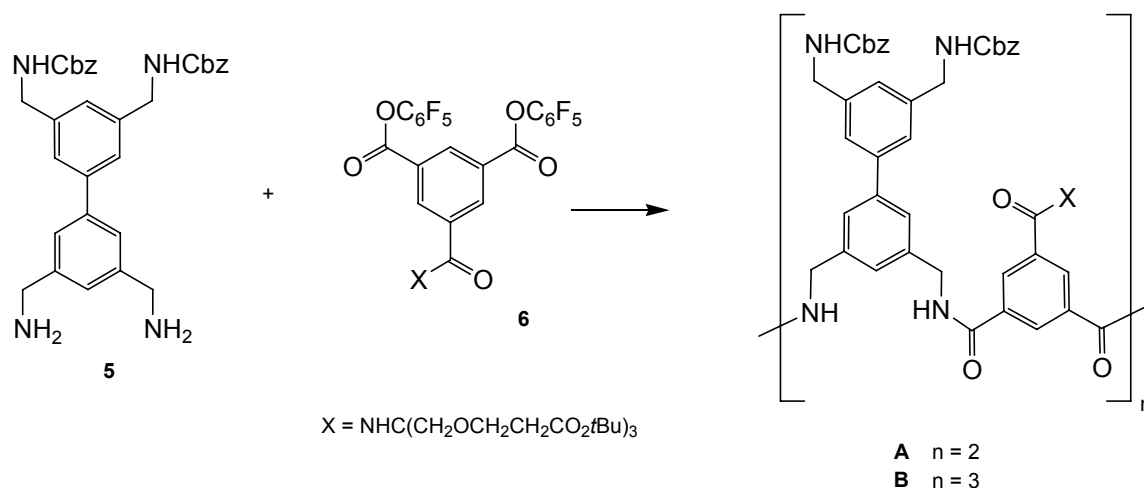

**Macrocyclisation of diamine 5 with bis-pentafluorophenyl ester 6.** A solution of bis-pentafluorophenyl ester **6**<sup>1</sup> (1.79 g, 1.74 mmol) in dry THF (55 mL) was added dropwise over 30 h to a solution of diamine **6**<sup>1</sup> (853 mg, 1.58 mmol) and *N,N*-diisopropylethylamine (1.7 mL, 9.50 mmol) in dry THF (1700 mL) under nitrogen and at RT. The reaction mixture was stirred vigorously for 24 h at RT. The solvent was removed under reduced pressure to give a crude solid that was taken up in chloroform (200 mL) and washed with saturated aqueous NH<sub>4</sub>Cl (100 mL), water (100 mL), saturated aqueous NaHCO<sub>3</sub> (100 mL) and brine (100 mL). The organic layer was dried (Na<sub>2</sub>SO<sub>4</sub>), filtered and the solvent was removed at reduced pressure. Flash column chromatography (eluent toluene/dichloromethane/ethyl acetate/ethanol, 35:30:30:0 to 35:30:30:6) afforded the mixture of macrocycles **7** (1.68 g, 90 %), which was used without further purification for the following step. Analysis by HPLC indicated that cyclodimer **A**<sup>1</sup> and cyclotrimer **B** formed ~65 % and ~25 % of the total respectively. Repeated purification by flash chromatography yielded a small sample of cyclotrimer **B**. *R*<sub>f</sub> = 0.70 (dichloromethane/ethyl acetate/methanol, 65:30:5); <sup>1</sup>H NMR (400 MHz, CDCl<sub>3</sub>/CD<sub>3</sub>OD 92:8): δ = 8.62, 8.42 (2 br s, 9 H, ArH), 7.42-7.03 (m, 48 H, ArH), 5.04 (s, 12 H, OCH<sub>2</sub>Ph), 4.62 (s, 12 H, CH<sub>2</sub>NH), 4.26 (s, 12 H, CH<sub>2</sub>NHCbz), 3.78 (s, 18 H, CCH<sub>2</sub>O), 3.63 (t, <sup>3</sup>J(H,H) = 6.0 Hz, 18 H, CH<sub>2</sub>CH<sub>2</sub>O), 2.37 (t, <sup>3</sup>J(H,H) = 6.0 Hz, 18 H, CH<sub>2</sub>CO), 1.34 (s, 81 H, CH<sub>3</sub>); <sup>13</sup>C NMR (100 MHz, CDCl<sub>3</sub>/CD<sub>3</sub>OD 92:8): δ = 171.0 (CO<sub>2</sub>*t*-Bu), 166.6, 166.3 (CONHC, CONHCH<sub>2</sub>), 156.9 (COOCH<sub>2</sub>Ph), 141.1, 139.5, 139.4, 139.2, 139.1 (ArC), 136.3 (Cbz-ArC), 135.9, 135.0 (ArC), 128.8, 128.7, 128.5, 128.3 (ArCH), 128.3, 127.9, 127.8 (Cbz-ArCH), 125.7, 125.6, 125.4, 125.1, 125.0 (ArCH), 80.6 (C(CH<sub>3</sub>)<sub>3</sub>), 68.7 (CCH<sub>2</sub>O), 66.9 (OCH<sub>2</sub>Ph), 66.6 (CH<sub>2</sub>CH<sub>2</sub>O), 60.3 (CCH<sub>2</sub>O), 44.5, 44.4 (CH<sub>2</sub>NHCbz, CH<sub>2</sub>NHCOAr), 36.0 (CH<sub>2</sub>CH<sub>2</sub>CO), 27.8 (CH<sub>3</sub>); IR: ν<sub>max</sub> = 3300, 2979, 1713, 1651, 1367, 1265, 1155, 907, 729 cm<sup>-1</sup>; MS(MALDI<sup>+</sup>): *m/z* 3623 [M+Na]<sup>+</sup>, 3639 [M+K]<sup>+</sup>.

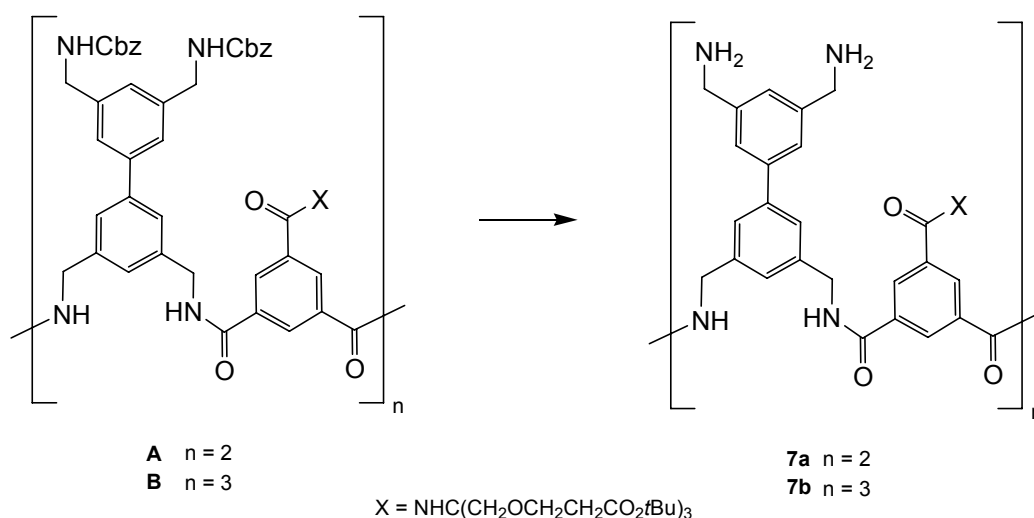

**Macrocyclic hexa-amine 7b.** The mixture of Cbz-protected macrocycles (**A**, **B** etc., 1.39 g, *ca.* 579  $\mu\text{mol}$ ) from the above cyclisation was dissolved in a mixture of THF and methanolic ammonia<sup>2</sup> 1:1 (100 mL). Pd on C (10 % w/w, *Aldrich* catalogue number 33,010-8, 1.38 g), previously activated by heating under vacuum with a heat gun, was added. The flask was evacuated and filled with hydrogen (1 atm) and the reaction mixture was stirred for 2 h 30 at RT. The Pd catalyst was removed by filtration, washed with ethyl acetate and the filtrate was evaporated under reduced pressure. The material was purified by flash column chromatography (eluent dichloromethane/methanolic ammonia,<sup>2</sup> 100:0 to 70:30) to yield the cyclotrimeric hexa-amine **7b** (215 mg, ~18 % based on **5**).  $R_f = 0.05$  (dichloromethane/methanolic ammonia, 90:10); <sup>1</sup>H NMR (400 MHz, CDCl<sub>3</sub>):  $\delta = 8.40$  (s, 3H, spacer-ArH), 8.19 (s, 6H, spacer-ArH), 7.80-7.25 (m, 18 H, ArH), 4.66 (s, 12 H, CH<sub>2</sub>NH), 3.45 (s, 24 H, CH<sub>2</sub>NH<sub>2</sub>, NH<sub>2</sub>), 3.82 (s, 18 H, CCH<sub>2</sub>O), 3.68 (t, <sup>3</sup>J(H,H) = 5.9 Hz, 18 H, CH<sub>2</sub>CH<sub>2</sub>O), 2.46 (t, <sup>3</sup>J(H,H) = 5.9 Hz, 18 H, CH<sub>2</sub>CO), 1.40 (s, 81 H, CH<sub>3</sub>); IR:  $\nu_{\text{max}} = 3310, 2929, 1726, 1264, 1159, 907, 728 \text{ cm}^{-1}$ . Also isolated was the cyclodimeric tetra-amine **7a** (593 mg, 55 %;  $R_f = 0.15$ ), as described in ref. 1.

This journal is (c) The Royal Society of Chemistry 2007

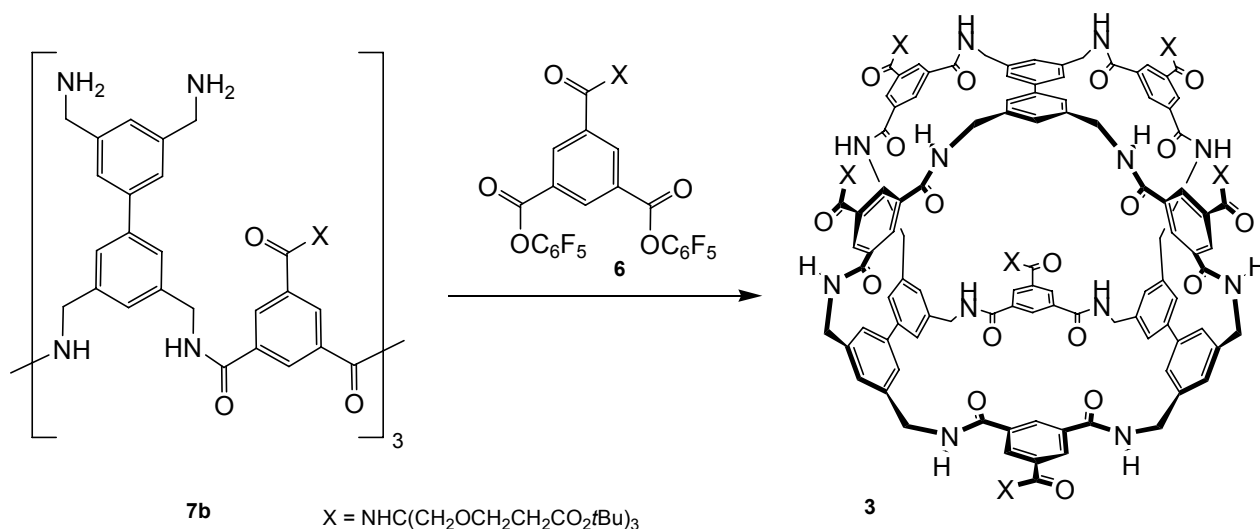

**Macrotetracyclic receptor 3.** To a stirred solution of hexaamine **7b** (232 mg, 83  $\mu\text{mol}$ ) and *N,N*-diisopropylethylamine (440  $\mu\text{L}$ , 2.5 mmol) in dry THF (500 mL) under nitrogen and at RT was added a solution of bis(pentafluorophenyl) ester **6** (282 mg, 270  $\mu\text{mol}$ ) in dry THF (50 mL), dropwise over 25 h. After a further 14 h the mixture was concentrated under vacuum to give a yellow solid. The solid was taken up in chloroform (200 mL) and washed with saturated aqueous  $\text{NH}_4\text{Cl}$  (75 mL), water (75 mL), saturated aqueous  $\text{NaHCO}_3$  (75 mL) and brine (75 mL). The organic layer was dried ( $\text{Mg}_2\text{SO}_4$ ), filtered and the solvent was removed at reduced pressure. The residue was purified by flash column chromatography (eluent dichloromethane/ethyl acetate/ethanol, 65:30:0 to 65:30:8) and afforded crude macrocyclic trimer **3** (318 mg, 79 %). The obtained product was subjected to further purification by preparative high performance liquid chromatography (Vydac Protein C4 column, 250 x 10 mm, 5  $\mu\text{m}$ , eluent methanol/water, 70:30 to 90:10 in 20 min then methanol/water, 90:10, flow rate 4  $\text{mL}\cdot\text{min}^{-1}$ ). The pure macrotricyclic **3** (59 mg, 15 %) was isolated as a white solid.  $R_f = 0.40$  (dichloromethane/ethyl acetate/ethanol, 60:35:5);  $^1\text{H}$  NMR (400 MHz,  $\text{CDCl}_3/\text{CD}_3\text{OD}$  85:15):  $\delta = 8.22$  (s, 12 H, spacer-ArH), 8.00 (s, 6 H, spacer-ArH), 7.32 (s, 12 H, ArH  $\alpha,\gamma$  to  $\text{CCH}_2\text{NHCOAr}$ ), 7.15 (s, 6 H, ArH  $\alpha$  to  $\text{CCH}_2\text{NHCOAr}$ ), 4.47 (A part of AB syst.,  $^2J(\text{H},\text{H}) = 14.4$  Hz, 12 H,  $\text{CH}_2\text{NH}$ ), 4.38 (B part of AB syst.,  $^2J(\text{H},\text{H}) = 14.4$  Hz, 12 H,  $\text{CH}_2\text{NH}$ ), 3.74 (s, 36 H,  $\text{CCH}_2\text{O}$ ), 3.62 (t,  $^3J(\text{H},\text{H}) = 6.3$  Hz, 36 H,  $\text{CH}_2\text{CH}_2\text{O}$ ), 2.39 (t,  $^3J(\text{H},\text{H}) = 6.1$  Hz, 36 H,  $\text{CH}_2\text{CO}$ ), 1.42 (s, 162 H,  $\text{CH}_3$ );  $^{13}\text{C}$  NMR (100 MHz,  $\text{CDCl}_3/\text{CD}_3\text{OD}$  92:8):  $\delta = 171.5$  ( $\text{CO}_2t\text{-Bu}$ ), 167.2 ( $\text{CONHC}$ ), 167.1 ( $\text{CONHCH}_2$ ), 141.2, 139.7 (ArC-Ar, Ar $\text{CCH}_2\text{NHCOAr}$ ), 136.8 (spacer-Ar $\text{CCONHC}$ ), 135.2 (spacer-Ar $\text{CCONHCH}_2\text{Ar}$ ), 129.1 (spacer-ArCH  $\alpha$  to  $\text{CCONHC}$ ), 128.1 (spacer-ArCH  $\gamma$  to  $\text{CCONHC}$ ), 125.2 (ArCH  $\alpha$  to  $\text{CCH}_2\text{NHCOAr}$ ), 126.1 (ArCH  $\alpha,\gamma$  to  $\text{CCH}_2\text{NHCOAr}$ ), 80.9 ( $\text{C}(\text{CH}_3)_3$ ), 69.1 ( $\text{CCH}_2\text{O}$ ), 67.2 ( $\text{CH}_2\text{CH}_2\text{O}$ ), 60.8 ( $\text{CCH}_2\text{O}$ ), 43.9 ( $\text{CH}_2\text{NH}$ ),

This journal is (c) The Royal Society of Chemistry 2007

36.4 (CH<sub>2</sub>CH<sub>2</sub>CO), 28.1 (CH<sub>3</sub>); IR:  $\nu_{\text{max}}$  = 3389, 2977, 2931, 2865, 1726, 1632, 1450, 1366, 1255, 1154, 1104 cm<sup>-1</sup>; MS(MALDI<sup>+</sup>):  $m/z$  4820 [M + K]<sup>+</sup>.

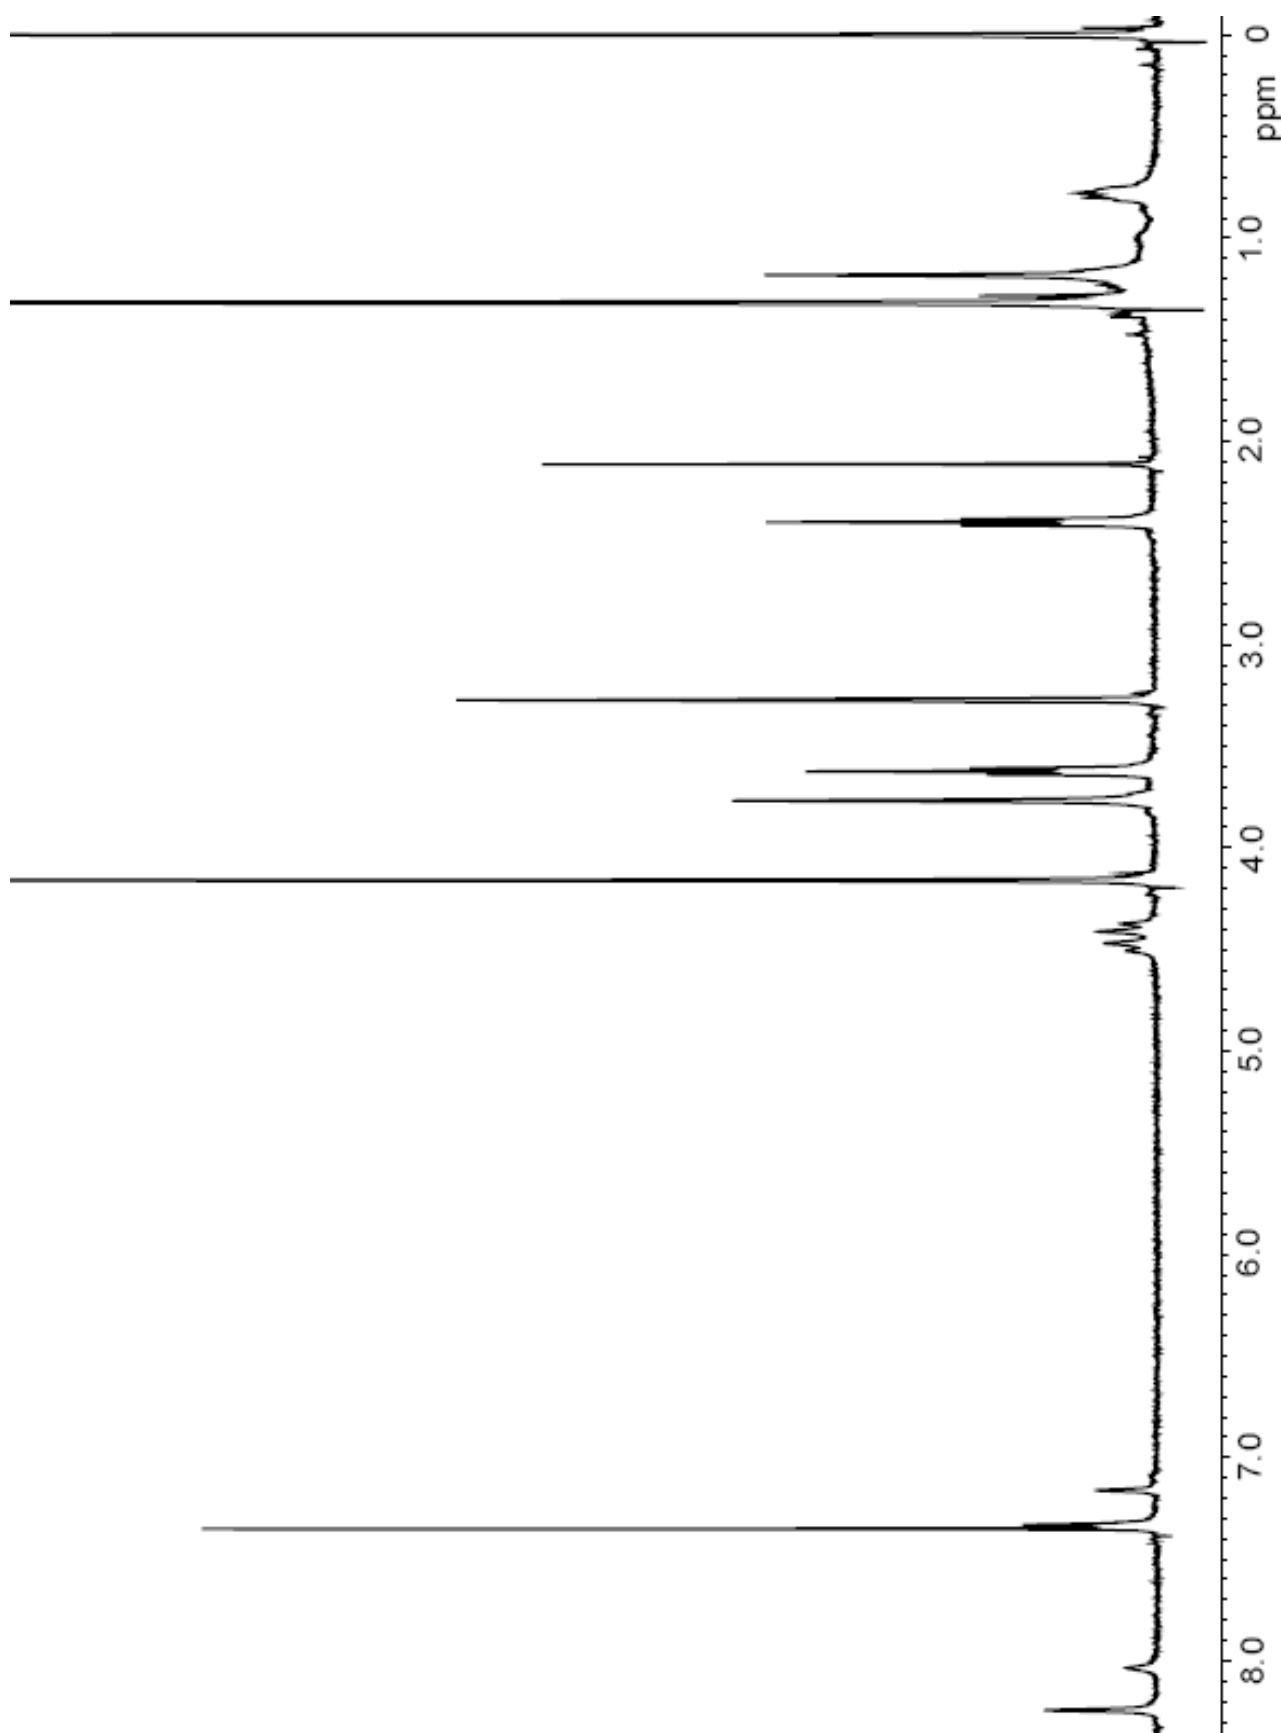

**Figure S1.**  $^1\text{H}$  NMR spectrum of receptor **3** (1 mM) in  $\text{CDCl}_3/\text{CD}_3\text{OD}$  (75/25).

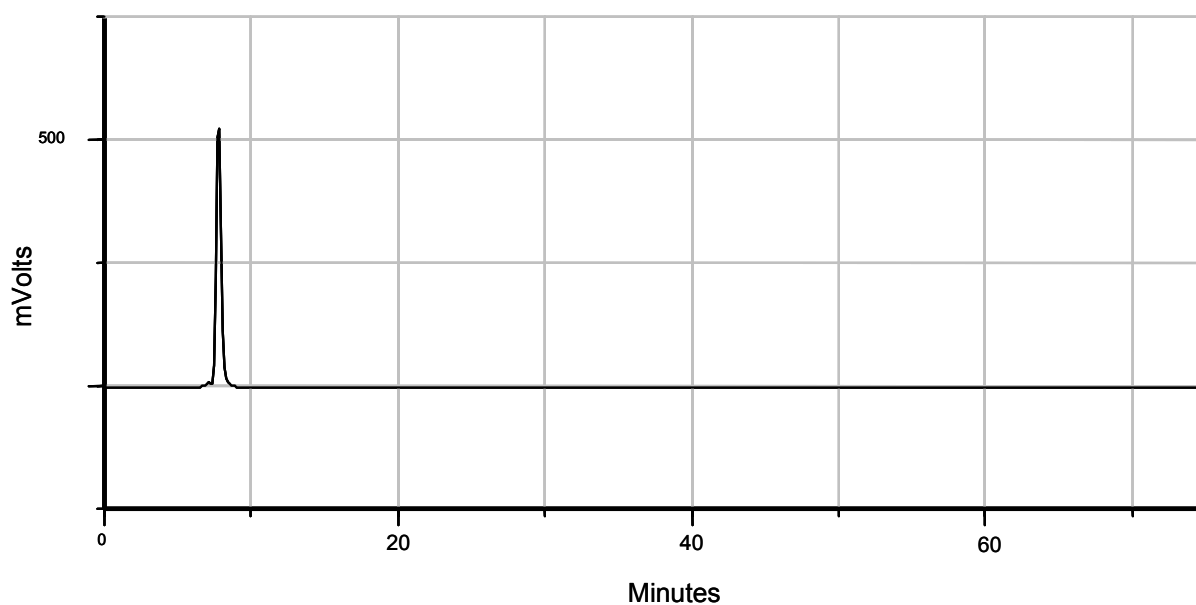

**Figure S2.** Chromatogram of receptor **3** on Hichrom ODS-2 column (250 x 4.6 mm, 5  $\mu\text{m}$ ).  
Eluent : methanol/water 70:30 to 90:10 in 10 minutes then methanol/water 90:10, flow rate 0.8 mL.min<sup>-1</sup>. Retention time = 7.77 min

**Reaction of 7b + 6 - further discussion.**

As **7b** contains 6 free amino groups, it might appear that reaction with **6** at high dilution could lead to a large number of polycyclic and/or polymeric products. However, free rotation about the Ar-Ar' bonds means that the amino groups on a given C<sub>6</sub>H<sub>3</sub>(CH<sub>2</sub>NH<sub>2</sub>)<sub>2</sub> unit are equivalent. Also, **6** cannot cyclise across a single C<sub>6</sub>H<sub>3</sub>(CH<sub>2</sub>NH<sub>2</sub>)<sub>2</sub> unit as the product is too strained. This limits the range of outcomes at each stage of the process. In the following analysis we assume (i) that 1:1 cyclisations are exclusively favoured (tending to truth at high dilution), and (ii) that all NH<sub>2</sub> groups are equally reactive so that the choice between alternatives is random. The structures of the intermediates are shown in Scheme S1 on the following page.

*Cyclisation 1:* According to the above assumptions, the reaction of **7b** with the first equivalent of **6** can lead to just one 1:1 cyclisation product, the macrobicycle **C** (see Scheme S1).

*Cyclisation 2:* In this case two macrotricycles **D** and **E** are possible, of which **D** represents the productive pathway (leading to **3** via a third 1:1 cyclisation). Considering the reactions in detail, **C** possesses two types of NH<sub>2</sub>, labelled \* and †. Statistically, half the molecules of **6** should react at NH<sub>2</sub>\*, and must then cyclise to form **D**. The other 50% react at NH<sub>2</sub>† and are then faced with a choice of 2 × NH<sub>2</sub>\* groups (leading to **D**) or the second NH<sub>2</sub>† (leading to **E**). Statistically, two thirds should yield **D**, while a third should lead to **E**. As shown in Figure S3, a total of 83% of **C** is expected to form **D**, while just 17% ends up as **E**.

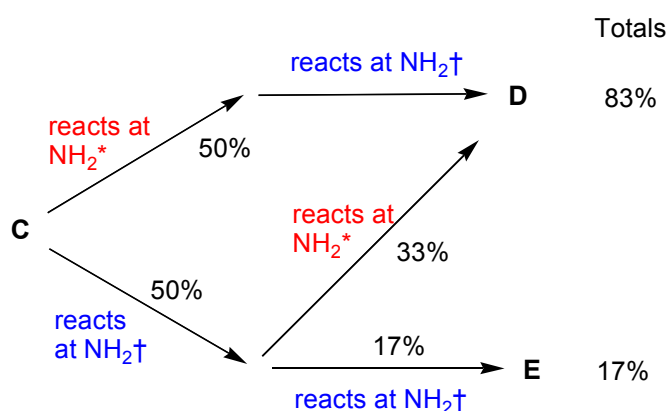

**Figure S3.** Pathways from bicycle **C** to tricycles **D** and **E**, with expected populations. For structures see Scheme S1.



This journal is (c) The Royal Society of Chemistry 2007

Although the assumptions are not strictly justified, the prospects of a high yield of **3** appear good. The actual yield of 15% might even seem disappointing, although this may reflect losses in purification rather than unproductive reaction pathways.

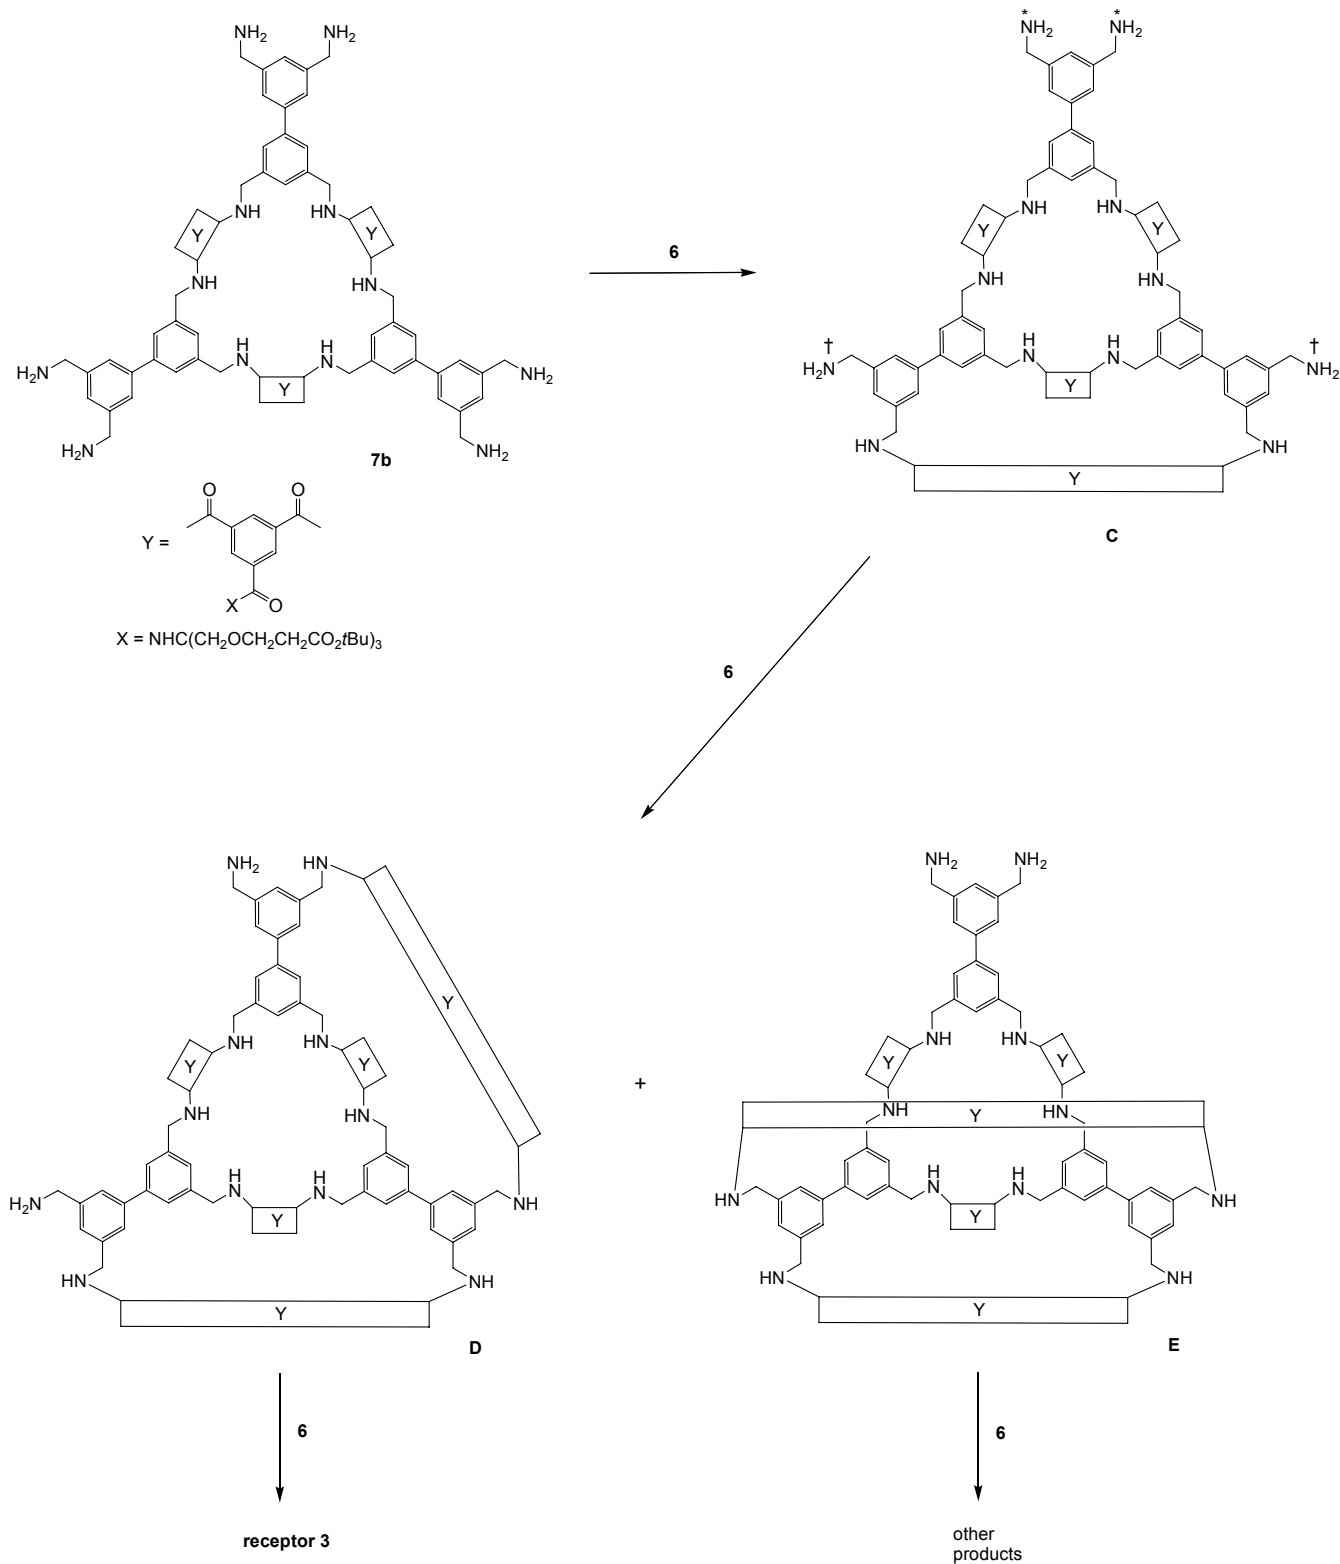

This journal is (c) The Royal Society of Chemistry 2007

**Scheme S1.** Structures formed from the cyclisation of hexa-amine **7b** with active ester **6**.

### **Binding Studies**

Substrates dodecyl  $\beta$ -D-maltoside **4a**, dodecyl  $\alpha$ -D-maltoside **9**, octyl  $\beta$ -D-glucoside **10**, and octyl  $\alpha$ -D-glucoside **11** were obtained commercially (Sigma-Aldrich). Octyl  $\beta$ -D-cellobioside **2a** was prepared as described previously.<sup>3</sup>

**<sup>1</sup>H NMR titrations.** Solutions of glycoside substrates were made up in CDCl<sub>3</sub>/CD<sub>3</sub>OD 75:25, and added as aliquots to an NMR tube containing receptor **3** in the same solvent (0.7  $\mu$ mol in 700  $\mu$ L, [3]<sub>initial</sub> = 1.0 mM). The sample tube was shaken carefully after each addition and <sup>1</sup>H-NMR spectra were recorded at 296 K. Spectra for the additions of  $\beta$ -D-maltoside **4a** and  $\beta$ -D-cellobioside **2a** are shown in Figures S4 and S5 respectively. In the case of **2a**, the chemical shift changes ( $\Delta\delta$ ) were analysed according to a 1:1 binding model, using a non-linear least squares curve-fitting program implemented within Excel. The programme yields binding constants  $K_a$  and limiting  $\Delta\delta$  as output. The resulting binding curve (experimental vs. calculated data) is shown in Figure S4.

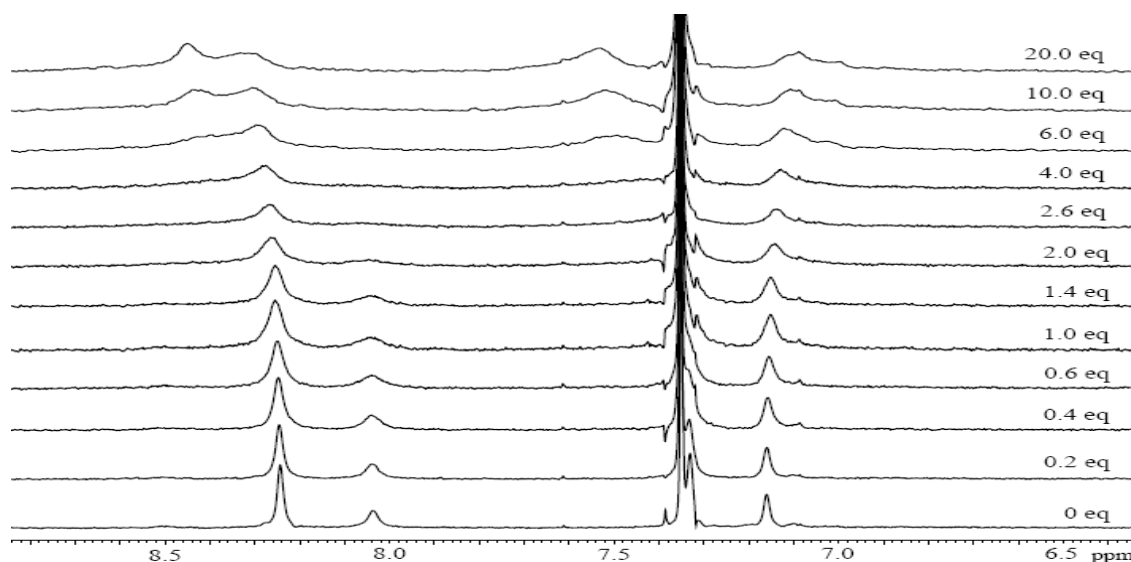

**Figure S4.** NMR spectra recorded for the binding study of receptor **3** vs dodecyl  $\beta$ -D-maltoside **4a** in CDCl<sub>3</sub>/CD<sub>3</sub>OD (75/25). [3]<sub>initial</sub> = 1 mM.

This journal is (c) The Royal Society of Chemistry 2007

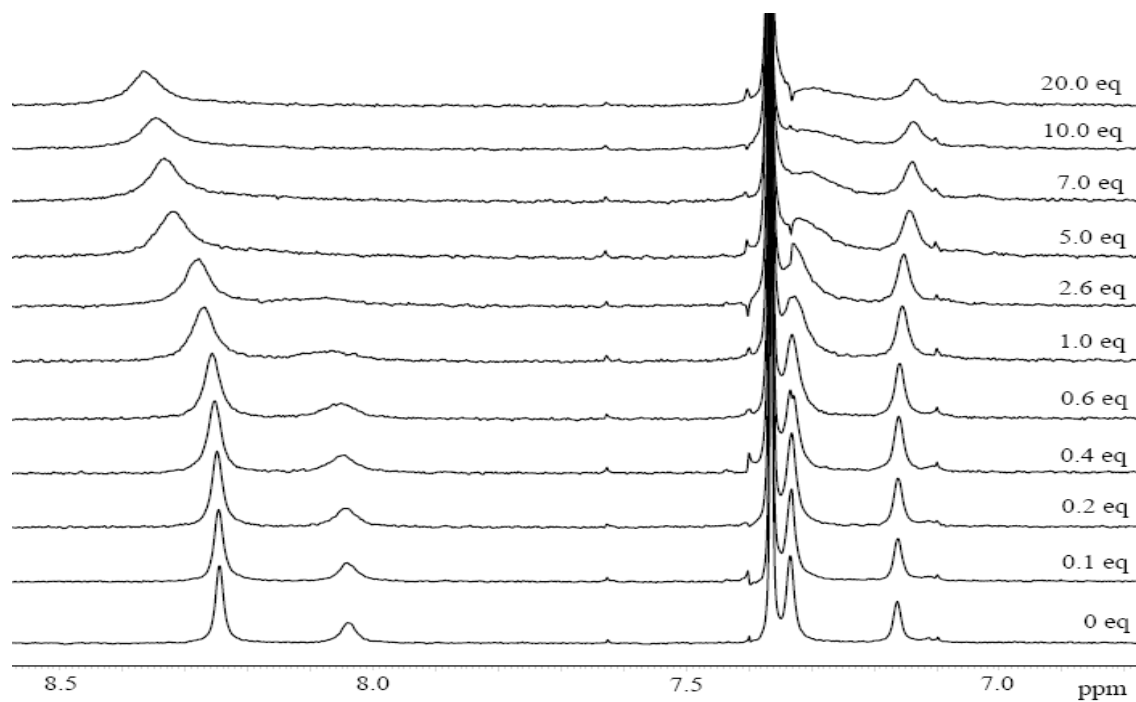

**Figure S5.** NMR spectra recorded for the binding study of receptor **3** vs octyl  $\beta$ -D-cellobioside **2a** in  $\text{CDCl}_3/\text{CD}_3\text{OD}$  (75/25).  $[\mathbf{3}]_{\text{initial}} = 1 \text{ mM}$ .

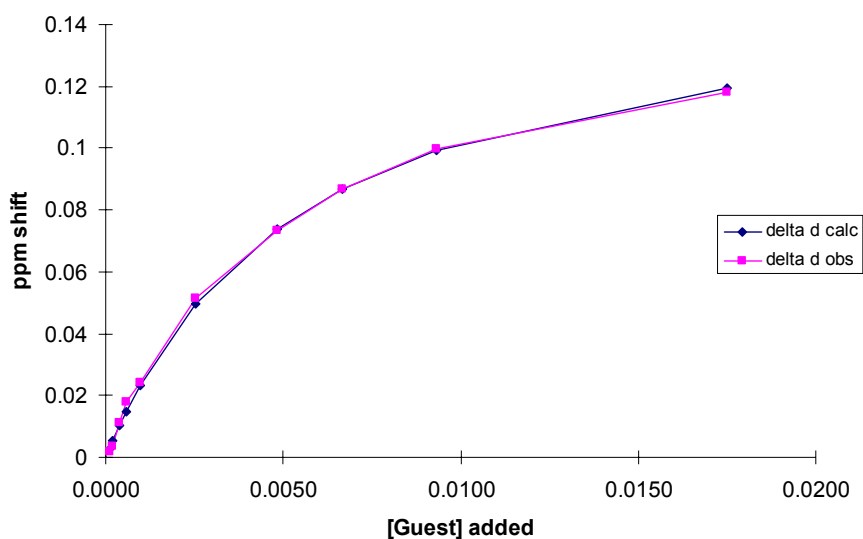

**Figure S6.** Analysis of data from Figure S5 (signal starting at 8.25 p.p.m.) according to a 1:1 binding model.  $K_a = 215 \text{ M}^{-1}$ , limiting  $\Delta\delta = 0.153 \text{ p.p.m.}$

**Circular Dichroism titrations.** Solutions of glycoside substrates were made up in CDCl<sub>3</sub>/CD<sub>3</sub>OD 75:25, and added as aliquots with stirring to a 10 mm path length cell containing receptor **3** in the same solvent (1 mL, [**3**]<sub>initial</sub> = 40 - 60 μM). Stirring was performed after each addition and CD spectra were recorded on a Jasco J-810 spectropolarimeter at 25°C. Spectra for the additions of β-D-maltoside **4a**, β-D-cellobioside **2a** and β-D-glucoside **10** are shown in figures S7, S9 and S11 respectively. In the case of **2a** and **4a** ellipticity changes (Δθ) were analysed according to a 1:1 binding model, using a non-linear least squares curve-fitting program implemented within Excel. The programme yields binding constants  $K_a$  and limiting Δθ as output. The resulting binding curves (experimental vs. calculated data) are shown in Figures S8 and S10. In the case of **10**, an attempt to analyse the data according to the 1:1 binding model yielded a very poor fit (Figure S12). Instead, the ellipticity changes were analysed according to a 1:1 + 1:2 binding model, using the programme WinEqNMR. The resulting binding curve is shown in Figure S13. The programme yields equilibrium constants  $K_{a1}$  and  $K_{a2}$  for the binding of successive substrate molecules to the receptor, i.e.:

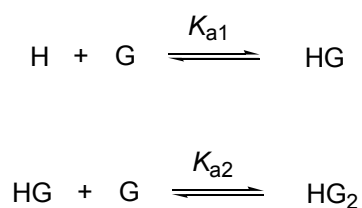

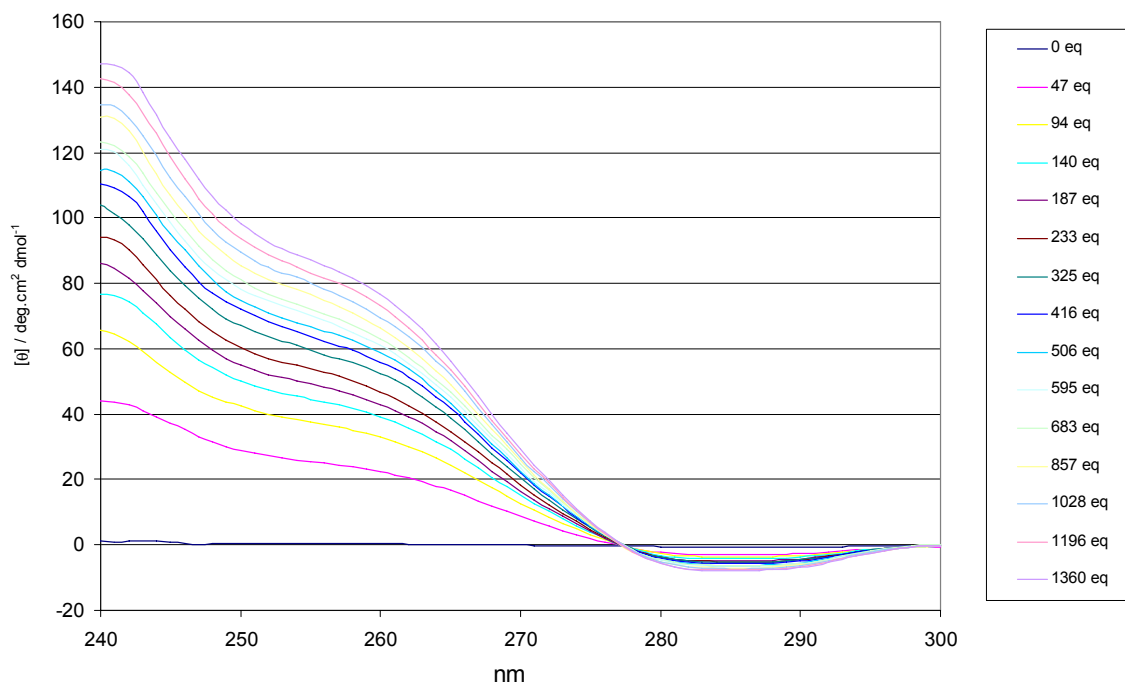

**Figure S7.** CD spectra recorded for the binding study of receptor **3** vs dodecyl  $\beta$ -D-maltoside **4a** in chloroform/methanol (75/25).  $[\text{Host}]_{\text{initial}} = 40 \mu\text{M}$ ,  $[\text{Guest}]_{\text{titrant}} = 0.094 \text{ M}$ .

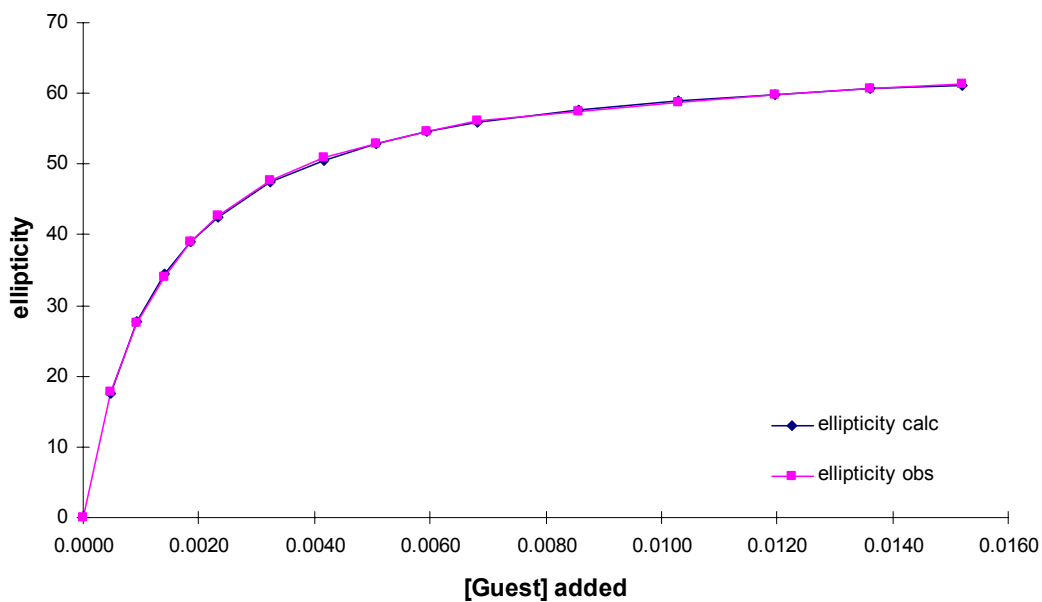

This journal is (c) The Royal Society of Chemistry 2007

**Figure S8.** Experimental and calculated values for the CD binding study (1:1) of receptor **3** + dodecyl  $\beta$ -D-maltoside **4a** in chloroform/methanol (75/25).  $[\text{Host}]_{\text{initial}} = 40 \mu\text{M}$ ,  $[\text{Guest}]_{\text{titrant}} = 0.094 \text{ M}$ . Ellipticities measured at 265 nm.  $K_a = 780 \text{ M}^{-1}$ , limiting ellipticity =  $67 \text{ deg cm}^2 \text{ dmol}^{-1}$ .

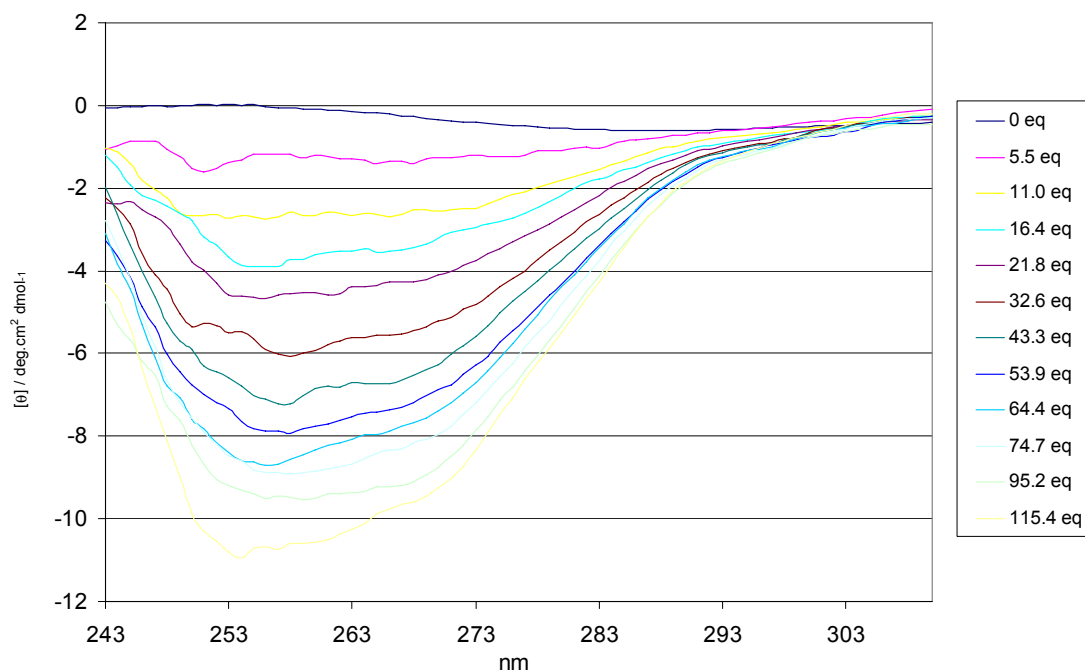

**Figure S9.** CD spectra recorded for the binding study of receptor **3** vs. octyl  $\beta$ -D-cellobioside **2a** in chloroform/methanol (75/25).  $[\text{Host}]_{\text{initial}} = 60 \mu\text{M}$ ,  $[\text{Guest}]_{\text{titrant}} = 0.066 \text{ M}$ .

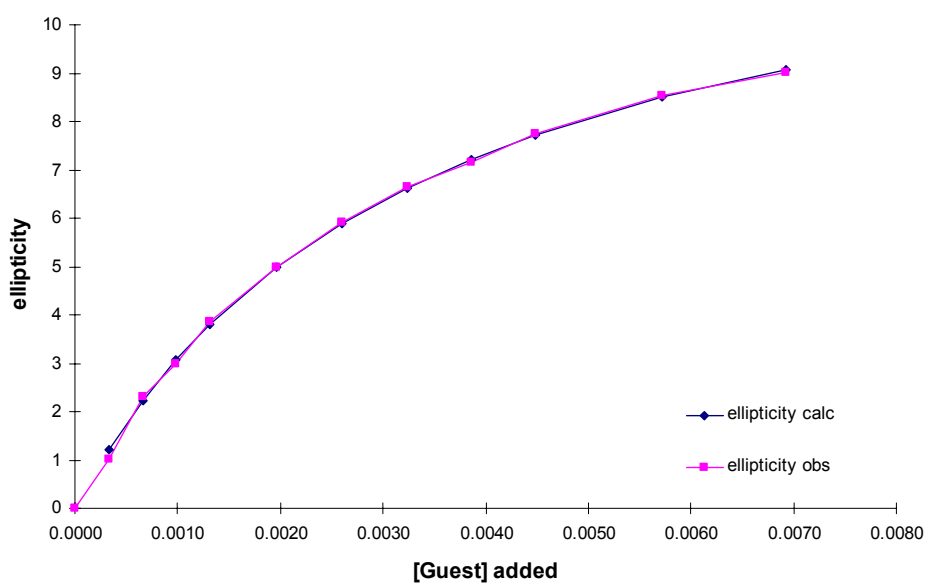

This journal is (c) The Royal Society of Chemistry 2007

**Figure S10.** Experimental and calculated values for the CD binding study (1:1) of receptor **3** + octyl  $\beta$ -D-cellobioside **2a** in chloroform/methanol (75/25).  $[\text{Host}]_{\text{initial}} = 60 \mu\text{M}$ ,  $[\text{Guest}]_{\text{titrant}} = 0.066 \text{ M}$ . Ellipticities measured at 270 nm.  $K_a = 310 \text{ M}^{-1}$ , limiting ellipticity =  $13.6 \text{ deg cm}^2 \text{ dmol}^{-1}$ .

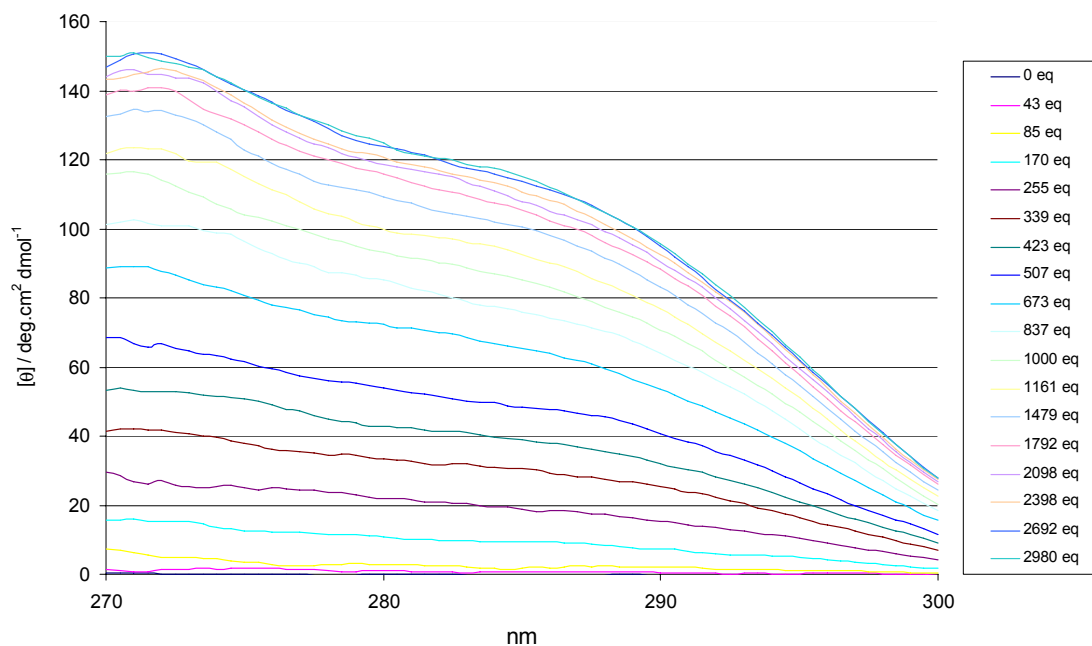

**Figure S11.** CD spectra recorded for the binding study of receptor **3** vs octyl  $\beta$ -D-glucoside **10** in chloroform/methanol (75/25).  $[\text{Host}]_{\text{initial}} = 40 \mu\text{M}$ ,  $[\text{Guest}]_{\text{titrant}} = 0.68 \text{ M}$ .

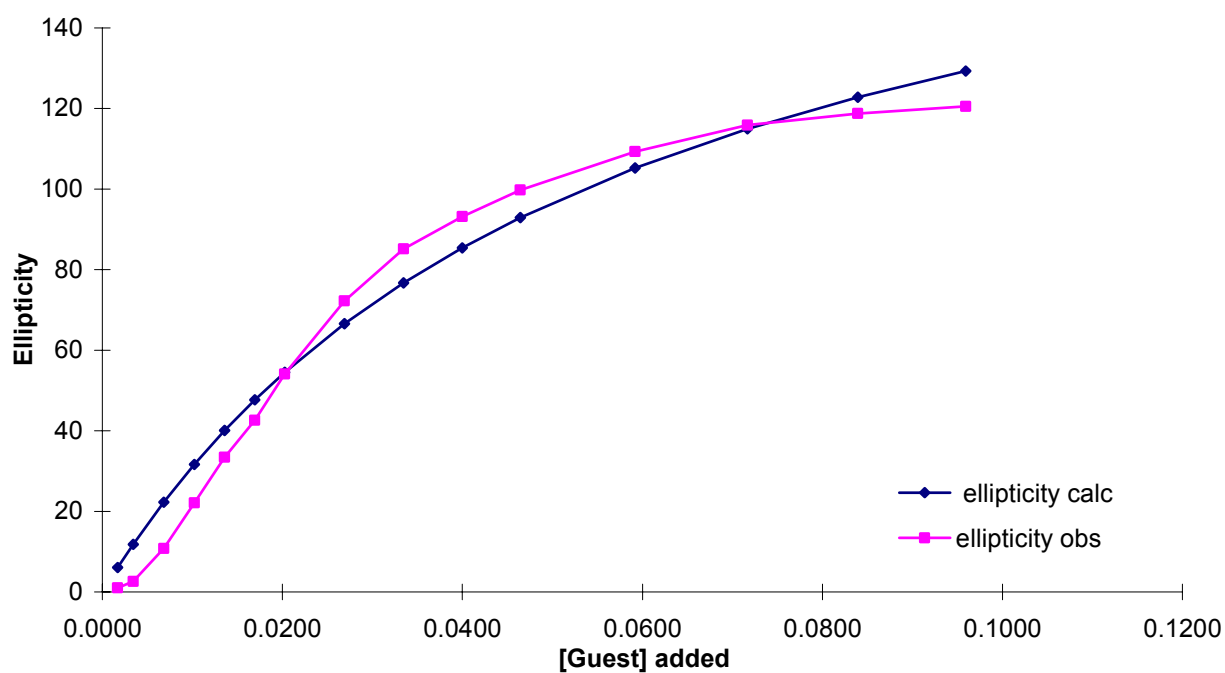



This journal is (c) The Royal Society of Chemistry 2007

**Figure S12.** Attempted analysis of the the CD binding study of receptor **3** + octyl  $\beta$ -D-glucoside **10** according to a 1:1 model. Solvent = chloroform/methanol (75/25).  $[\text{Host}]_{\text{initial}} = 40 \mu\text{M}$ ,  $[\text{Guest}]_{\text{titrant}} = 0.7 \text{ M}$ . Ellipticities measured at 280 nm.

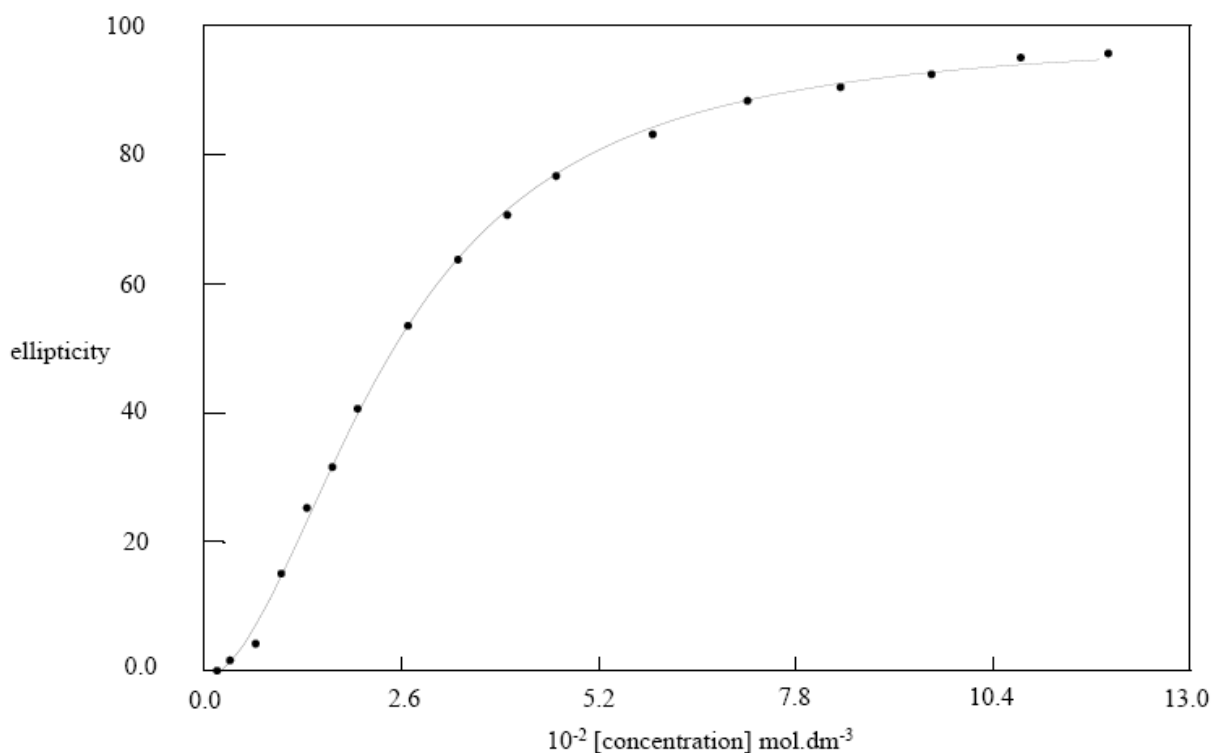

**Figure S13.** Analysis of the data from Figure 12 according to a 1:1 + 1:2 binding model (experimental points and calculated curve).  $K_{a1} = \sim 1 \text{ M}^{-1}$ ;  $K_{a2} = 1470 \text{ M}^{-1}$ . Limiting ellipticity for 1:2 complex =  $98.04 \text{ deg cm}^2 \text{ dmol}^{-1}$ . *Errors:* The error in  $K_{a2}$  as estimated by WinEqNMR, is  $\pm 16\%$ .  $K_{a1}$  is relatively uncertain, as expected for very weak binding. WinEqNMR estimates an upper limit of  $4 \text{ M}^{-1}$ .

## References and Notes

1. E. Klein, M. P. Crump and A. P. Davis, *Angew. Chem., Int. Ed.*, 2005, **44**, 298.
2. Methanolic ammonia was prepared by passing ammonia through ice-cooled methanol until no further increase in volume was observed.
3. G. Lecollinet, A. P. Dominey, T. Velasco and A. P. Davis, *Angew. Chem., Int. Ed.*, 2002, **41**, 4093.
